# Supplementary material for: Short-Stranded Zein Fibers for Muscle Tissue Engineering in Alginate-Based Composite Hydrogels
Source: MDPI journal article supplement (doi:10.3390/gels9110914), 2023-11-17
Supplement: s1 [file s1]

# Short-Stranded Zein Fibers for Muscle Tissue Engineering in Alginate-Based Composite Hydrogels

Lea Melzener <sup>1,2</sup>, Sergio Spaans <sup>2</sup>, Nicolas Hauck <sup>2</sup>, André J. G. Pötgens <sup>2</sup>, Joshua E. Flack <sup>2</sup>, Mark J. Post <sup>1,2</sup> and Arin Doğan <sup>2,\*</sup>

<sup>1</sup> Department of Physiology, Maastricht University, Maastricht, The Netherlands

<sup>2</sup> Mosa Meat B.V., Maastricht, The Netherlands

\* Correspondence: arin@mosameat.com

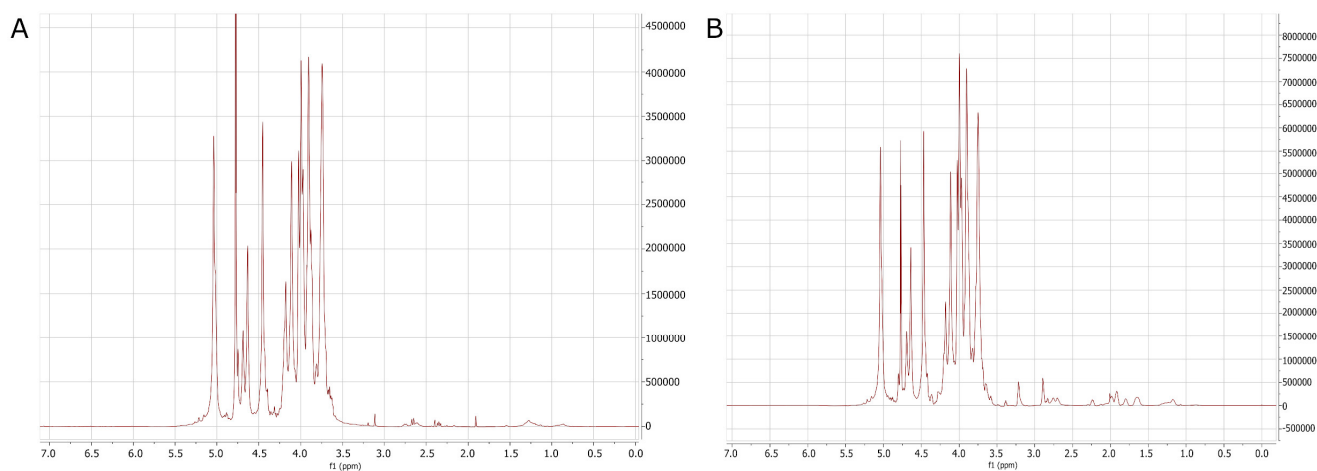

**Figure S1.** NMR spectra (A) Crude alginate before purification and functionalization. Some minor impurities were observed in the lower ppm range (1.0-3.5). (B) RGD-functionalized alginate. New peaks corresponding to the protons from the peptide side chains can be observed at the lower ppm range (1.0-3.5).

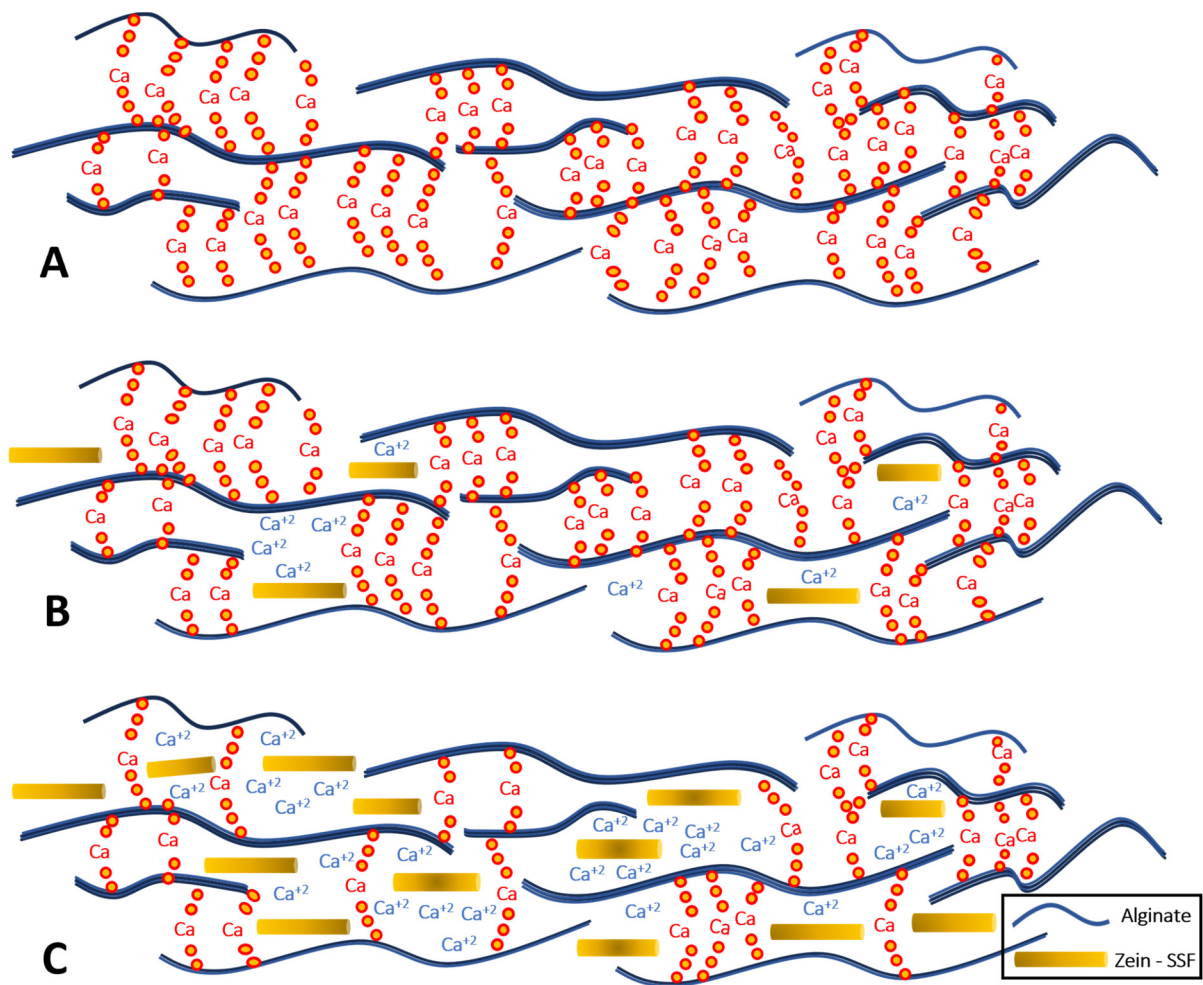

**Figure S2.** Zein interference of calcium crosslinking in alginate hydrogels. A: low concentration of zein-SSFs, with increased ionic crosslinking B: high concentration of zein-SSFs, with decreased ionic crosslinking.

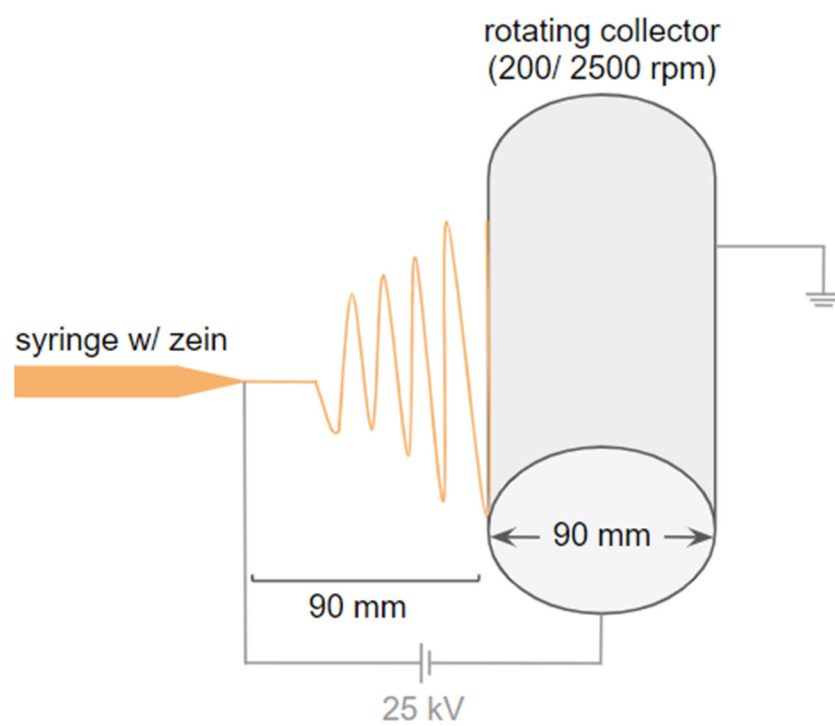

**Figure S3.** Electrospinning setup.

**Table S1.** Media formulations.

| #                                                        | Component                                  | Reference                         | Concentration           |
|----------------------------------------------------------|--------------------------------------------|-----------------------------------|-------------------------|
| <b>Serum-free growth medium (SFGM)</b>                   |                                            |                                   |                         |
| 1                                                        | DMEM/F-12                                  | P04-041262B, PAN Biotech          |                         |
| 2                                                        | $\alpha$ -linolenic acid                   | L2376, Sigma Aldrich              | 1 $\mu\text{g ml}^{-1}$ |
| 3                                                        | bFGF-2                                     | 100-18B, Peprotech                | 10 ng ml <sup>-1</sup>  |
| 4                                                        | bHGF                                       | 100-39H, Peprotech                | 50 ng ml <sup>-1</sup>  |
| 5                                                        | Bovine Serum Albumin (BSA)                 | A9418, Sigma Aldrich              | 5 mg ml <sup>-1</sup>   |
| 6                                                        | D-glucose                                  | G7021, Sigma Aldrich              | 17.7 mM                 |
| 7                                                        | Glutamax                                   | 35050061, ThermoFisher            | 2 mM                    |
| 8                                                        | Hydrocortisone                             | H0888, Sigma Aldrich              | 36 ng ml <sup>-1</sup>  |
| 9                                                        | IGF-1                                      | 100-11, Peprotech                 | 100 ng ml <sup>-1</sup> |
| 10                                                       | ITSE                                       | 00-101, biogems                   | 1%                      |
| 11                                                       | L-ascorbic acid 2-phosphate (Vitamin C)    | A8960, Sigma Aldrich              | 155 $\mu\text{M}$       |
| 12                                                       | LIF                                        |                                   | 5 ng ml <sup>-1</sup>   |
| 13                                                       | PDGF-BB                                    | 100-14B, Peprotech                | 10 ng ml <sup>-1</sup>  |
| 14                                                       | Penicillin/Streptomycin/Amphotericin (PSA) | 17-745E, Lonza                    | 1%                      |
| 16                                                       | VEGF                                       | 100-20, Peprotech                 | 10 ng ml <sup>-1</sup>  |
| <b>Serum-free myogenic differentiation medium (SFDm)</b> |                                            |                                   |                         |
| 1                                                        | DMEM                                       | A14430-01, Gibco                  |                         |
| 2                                                        | EGF-1                                      | AF-100-15, Peprotech              | 10 ng ml <sup>-1</sup>  |
| 3                                                        | D-glucose                                  | G7021, Sigma                      | 5.5 mM                  |
| 4                                                        | GlutaMax                                   | 35050061, ThermoFisher            | 2 mM                    |
| 5                                                        | Human Serum Albumin                        | Rc HA NW20, Richcore Lifesciences | 0.5 mg ml <sup>-1</sup> |
| 6                                                        | ITSE                                       | 00-101, biogems                   | 2%                      |
| 7                                                        | L-ascorbic acid 2-phosphate (Vitamin C)    | A8960, Sigma Aldrich              | 40 $\mu\text{M}$        |
| 8                                                        | MEM Amino Acids Solution                   | 11130-051, ThermoFisher           | 0.50%                   |
| 9                                                        | NaHCO <sub>3</sub>                         | P2256, Sigma Aldrich              | 6.5 mM                  |
| 10                                                       | Penicillin/Streptomycin/Amphotericin (PSA) | 17-745E, Lonza                    | 1%                      |
| 11                                                       | Soy hydrolysates                           | 58903C, Merck                     | 1%                      |
| 12                                                       | Sodium l-lactate                           | 71718, Sigma                      | 10 mM                   |
| 13                                                       | Sodium pyruvate                            | P2256, Sigma Aldrich              | 0.5 mM                  |

**Table S2.** Antibodies used in this study.

| Target                  | Colour  | Source          | Dilution                  | Reference   | Application            |
|-------------------------|---------|-----------------|---------------------------|-------------|------------------------|
| $\alpha$ -alpha-actin-1 | -       | Abcam           | 1:5000                    | ab184705    | Western Blot           |
| $\alpha$ -actinin       | -       | Sigma-Aldrich   | 1:2500                    | A7811       | Western Blot           |
| desmin                  | -       | Abcam           | 1:3000                    | ab227651    | ELISA                  |
| f-actin                 | Atto550 | Sigma-Aldrich   | 1:300                     | 19083       | IF                     |
| ITGA5                   | PE      | Miltenyi Biotec | 1:50                      | 130-110-532 | Flow                   |
| ITGA7                   | APC     | Miltenyi Biotec | 1:50                      | 130-123-833 | Flow                   |
| myoglobin               | -       | Abcam           | 1:2500                    | ab231725    | Western Blot           |
| myosin                  | -       | Abcam           | 1.5 $\mu\text{g ml}^{-1}$ | ab11083     | ELISA                  |
| myosin                  | -       | Abcam           | 0.8 $\mu\text{g ml}^{-1}$ | ab197687    | ELISA                  |
| streptavidin            | HRP     | Abcam           | 1:1000                    | ab7403      | ELISA                  |
| anti-mouse              | HRP     | Dako            | 1:2000                    | P0447       | Western Blot           |
| anti-rabbit             | HRP     | Abcam           | 1:8000                    | ab6721      | ELISA,<br>Western Blot |
